# Supplementary material for: An investigation of the dye palette in Chinese silk embroidery from Dunhuang (Tang dynasty)
Source: Springer Nature journal article supplement (doi:10.1007/s12520-017-0592-4), 2018-01-30
Supplement: 12520_2017_592_MOESM1_ESM.pdf [file 12520_2017_592_MOESM1_ESM.pdf]

# **An investigation of the dye palette in Chinese silk embroidery from Dunhuang (Tang dynasty)**

Diego Tamburini<sup>1\*</sup>, Caroline R Cartwright<sup>1</sup>, Monique Pullan<sup>2</sup>, Hannah Vickers<sup>2</sup>

<sup>1</sup> Department of Scientific Research, The British Museum, Great Russell Street, London WC1B 3DG, UK

<sup>2</sup> Department of Conservation, The British Museum, Great Russell Street, London WC1B 3DG, UK

\* Corresponding author: Dr. Diego Tamburini, Department of Scientific Research, The British Museum, Great Russell Street, WC1B 3DG, London, United Kingdom;

email: [DTamburini@britishmuseum.org](mailto:DTamburini@britishmuseum.org)

Tel: +44 02073238123

ORCID: 0000-0002-4107-0430

## Supplementary material

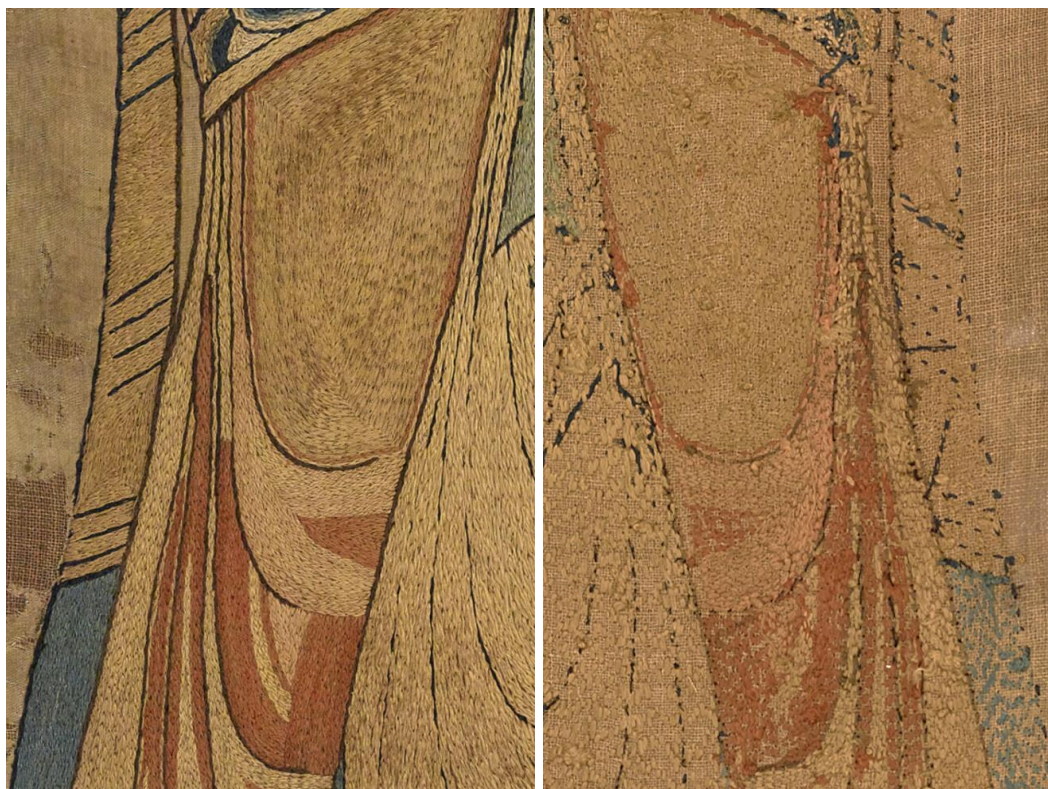

**Figure S1.** Comparison of the same area from the front (left) and the back (right) of the embroidery showing the difference in the brightness of the pink colour.

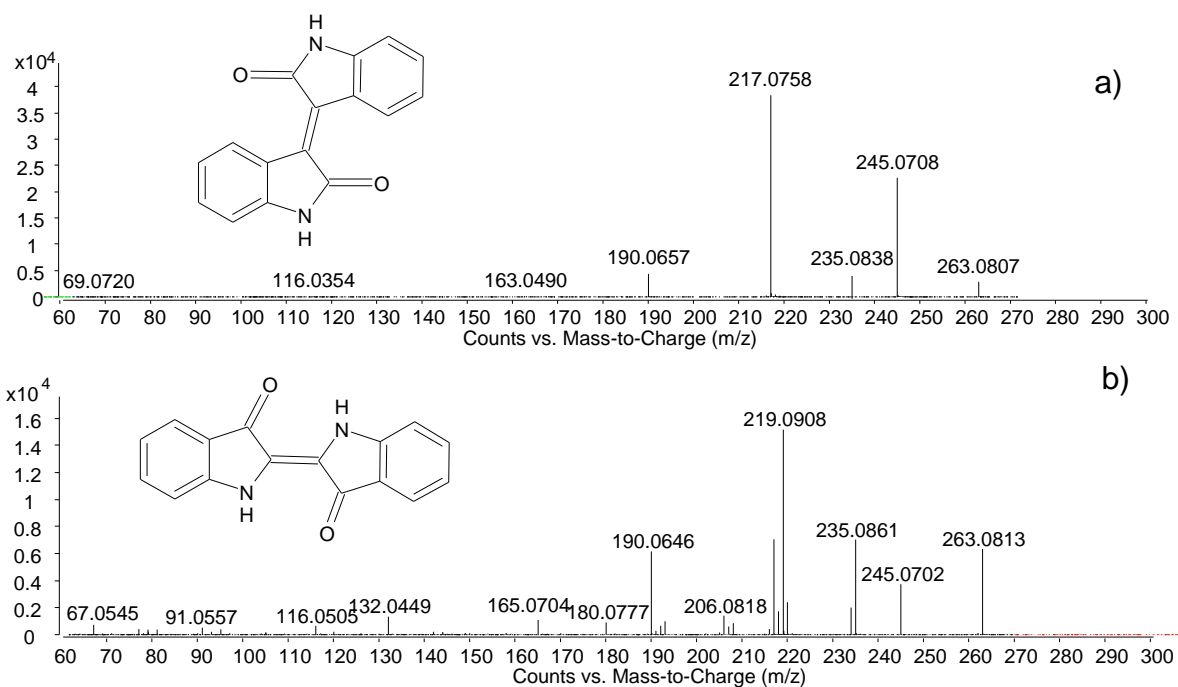

**Figure S2.** MS/MS spectra (positive ESI, collision energy 30V) of **a)** indigotin isomer, tentatively assigned to isoindigotin compared to **b)** indigotin.

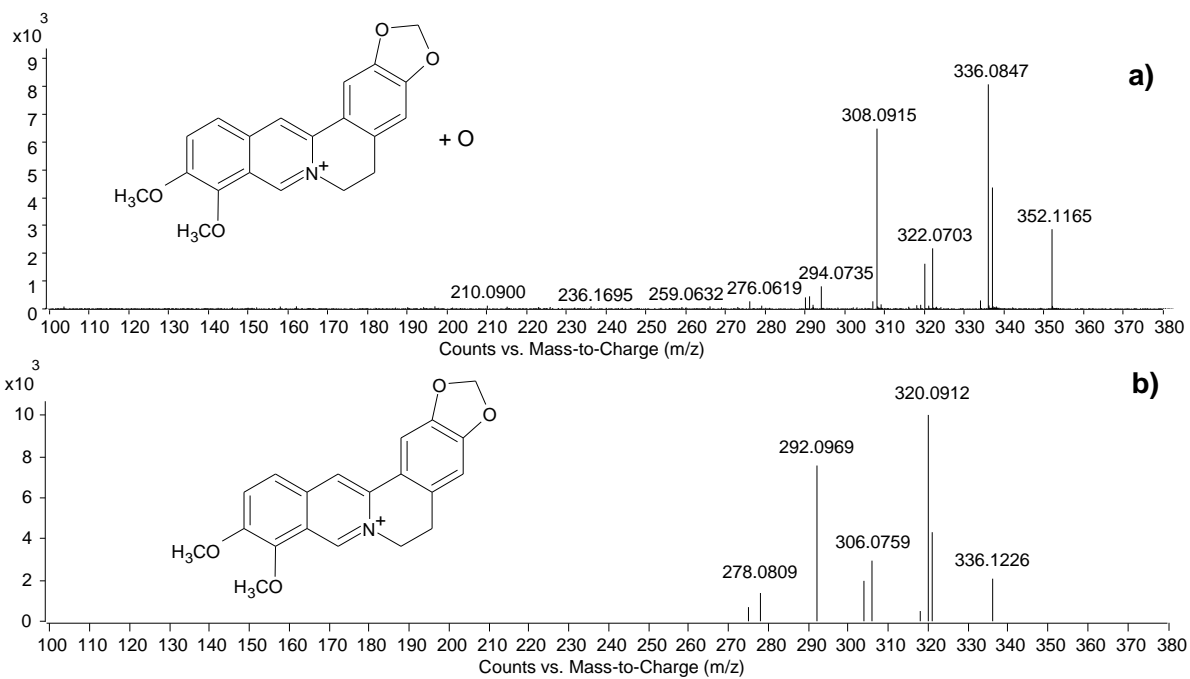

**Figure S3.** MS/MS spectra (positive ESI, collision energy 30V) of **a)** berberine oxidation product compared to **b)** berberine.

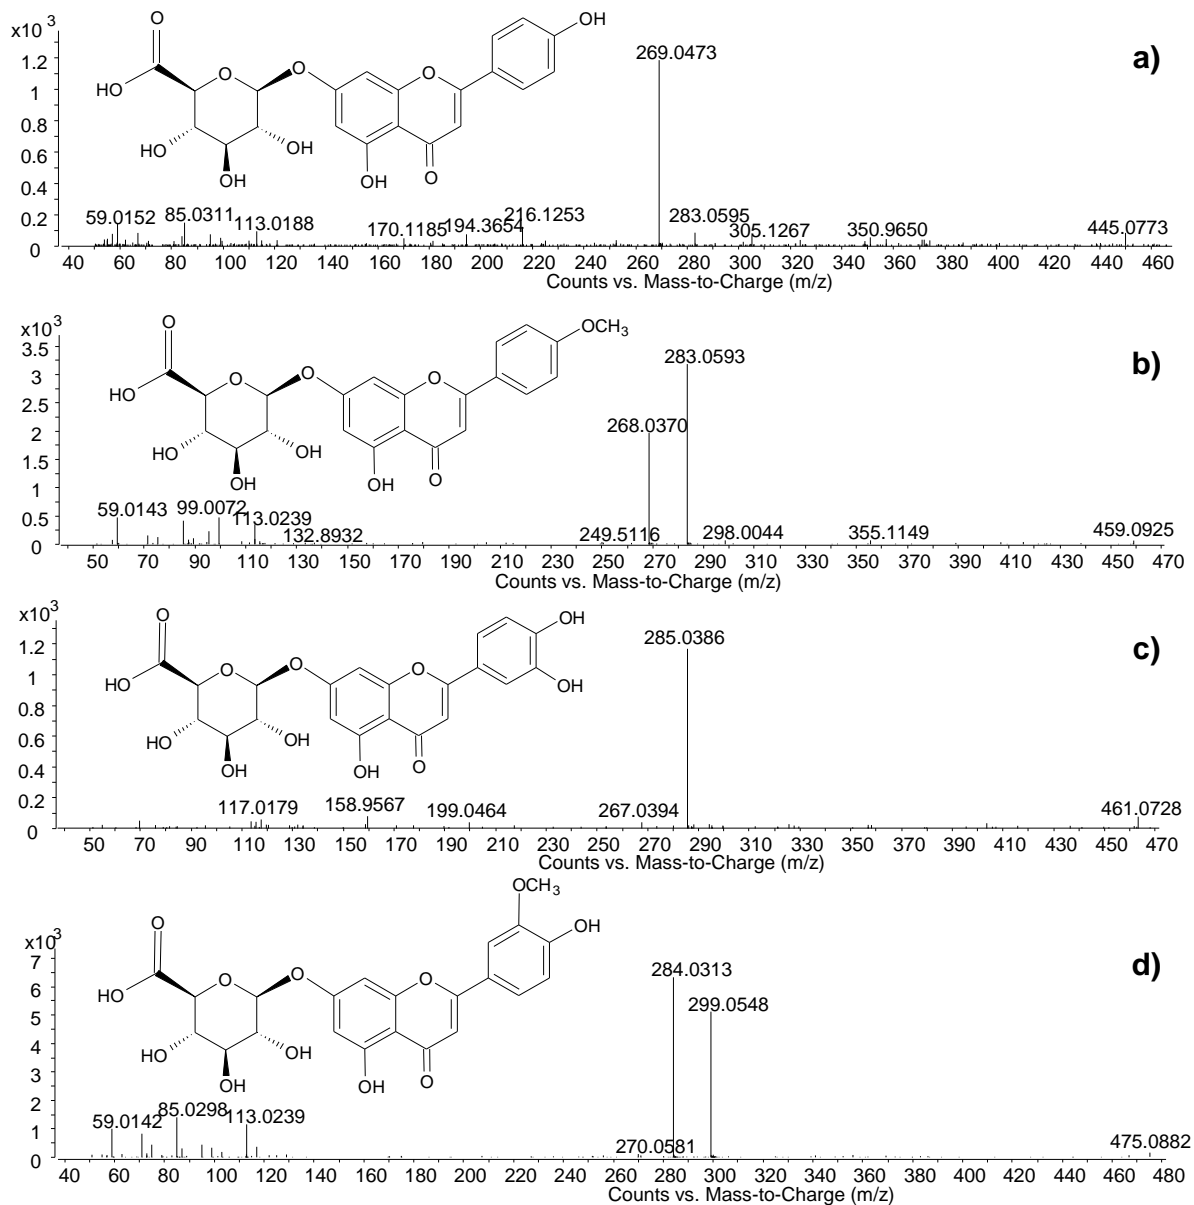

**Figure S4.** MS/MS spectra (negative ESI, collision energy 20V) of **a)** apigenin glucuronide, **b)** O-methylated flavone glucuronide, **c)** luteolin glucuronide, **d)** chrysoeriol glucuronide detected in the pink sample 20D.

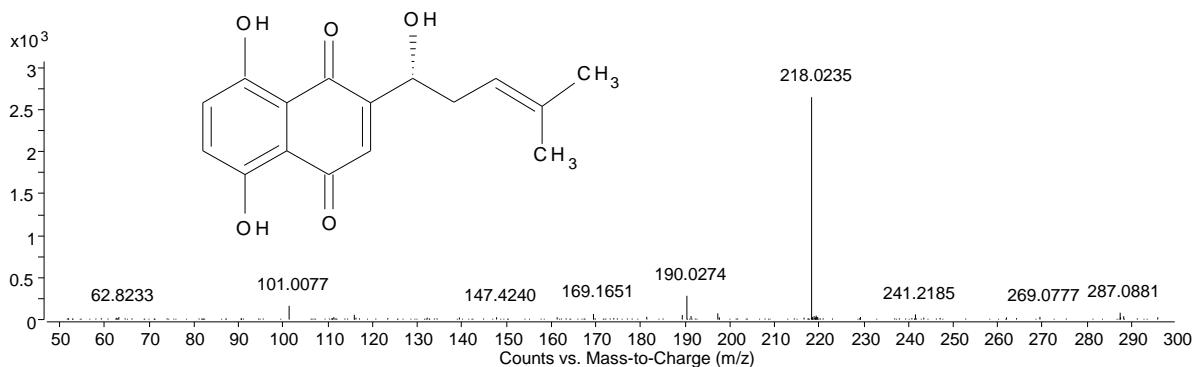

**Figure S5.** MS/MS spectrum (negative ESI, collision energy 20V) of shikonin.

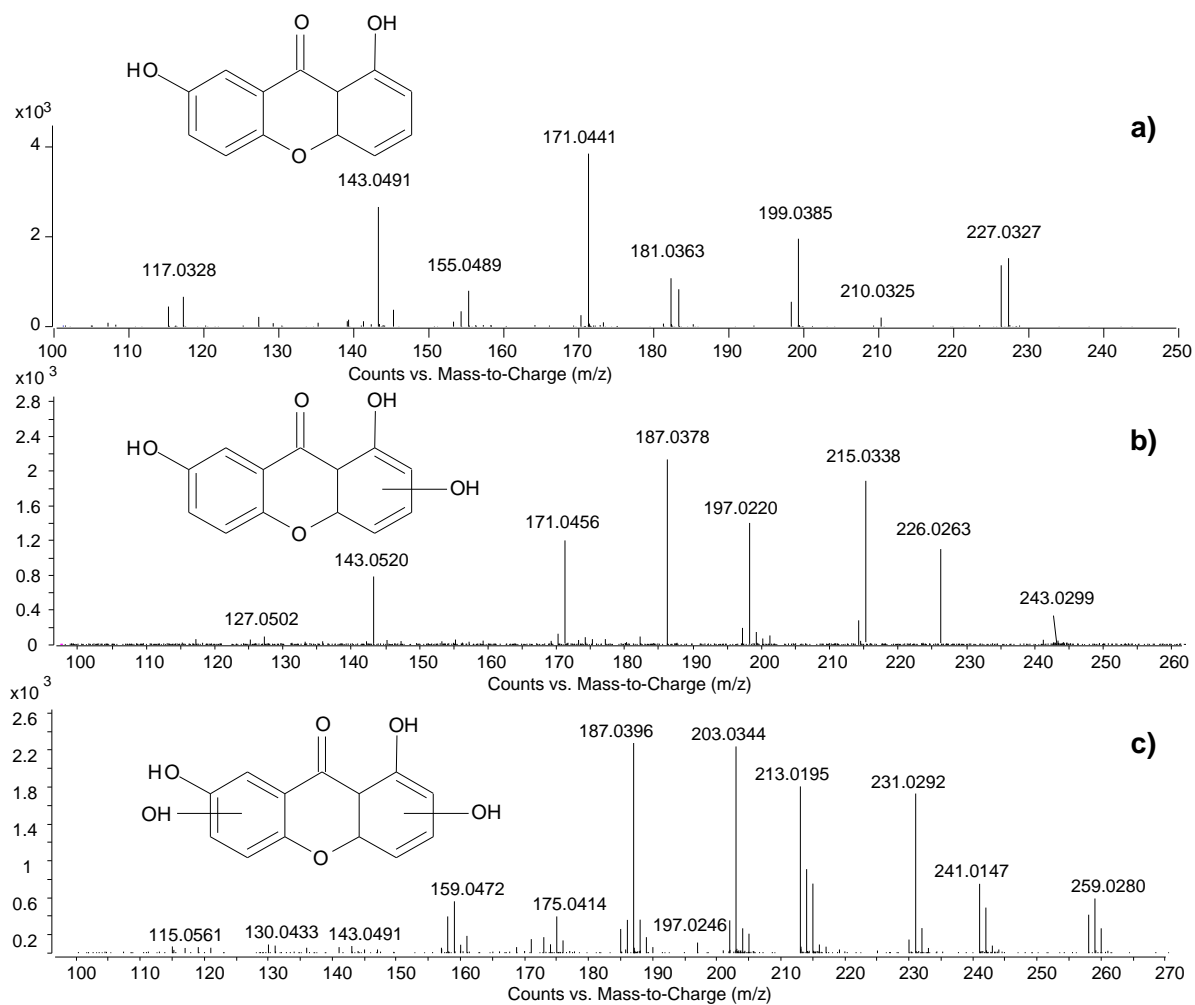

**Figure S6.** MS/MS spectra (negative ESI, collision energy 25V) of **a)** euxanthone (dihydroxyxanthone), **b)** "type C compound" (tentatively assigned to trihydroxyxanthone) and **c)** oxidation product of "type C compound" (tentatively assigned to tetrahydroxyxanthone).

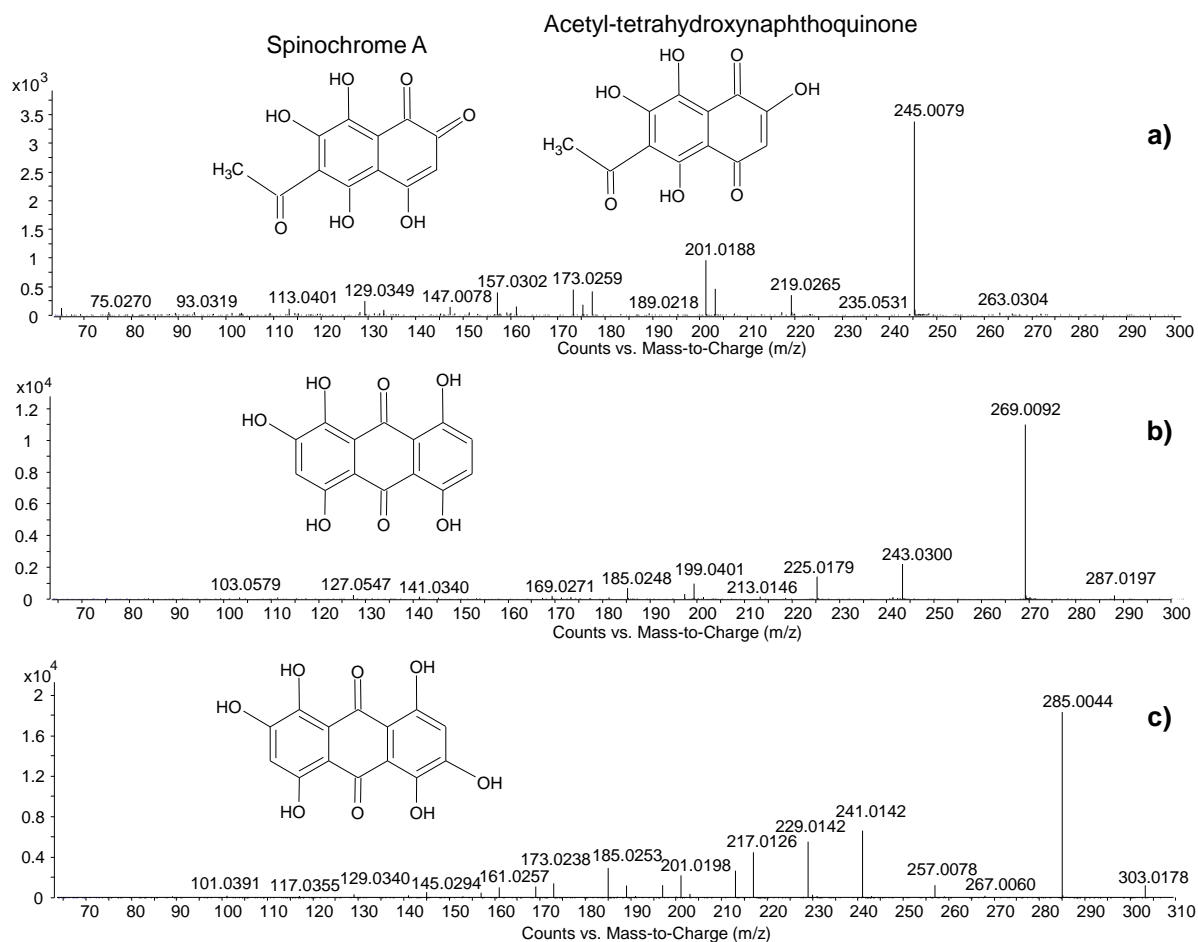

**Figure S7.** MS/MS spectra (negative ESI, collision energy 25V) of some compounds detected in samples 11D and 23D with calculated molecular masses of the deprotonated molecules **a)**  $m/z$  263.0197 (tentatively assigned to spinochrome A or acetyl-tetrahydroxynaphthoquinone), **b)**  $m/z$  287.0197 (tentatively assigned to pentahydroxyanthraquinone) and **c)** 303.0146 (tentatively assigned to hexahydroxyanthraquinone).

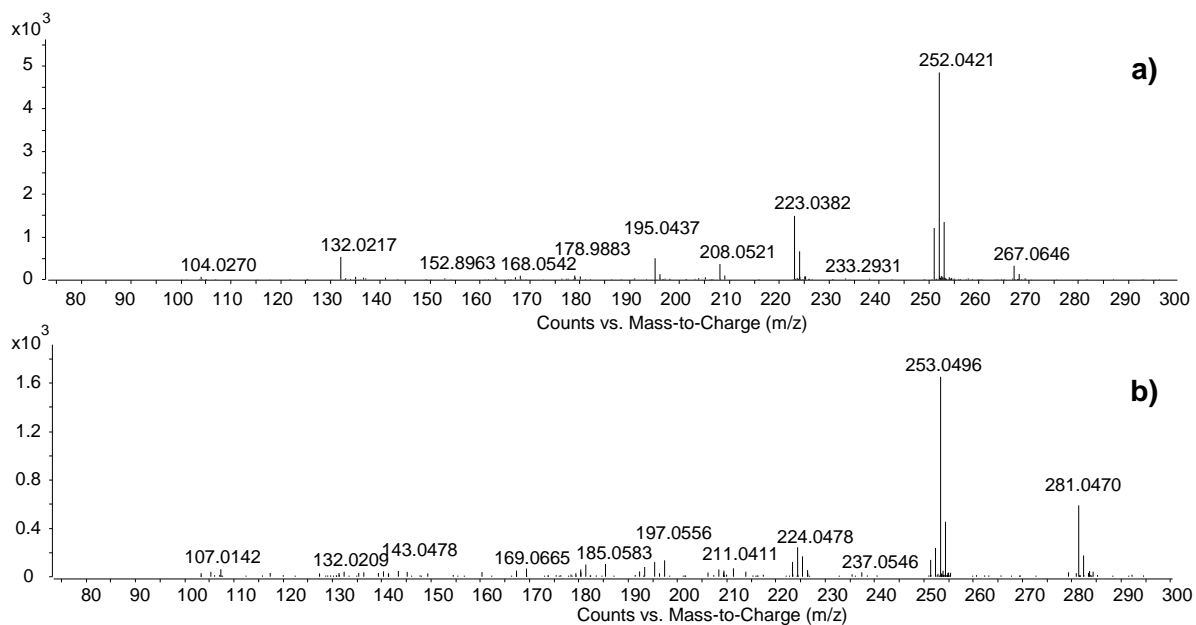

**Figure S8.** MS/MS spectra (negative ESI, collision energy 25V) of some compounds detected in samples 11D and 23D with calculated molecular masses of the deprotonated molecules **a)**  $m/z$  267.0663 and **b)**  $m/z$  281.0455.

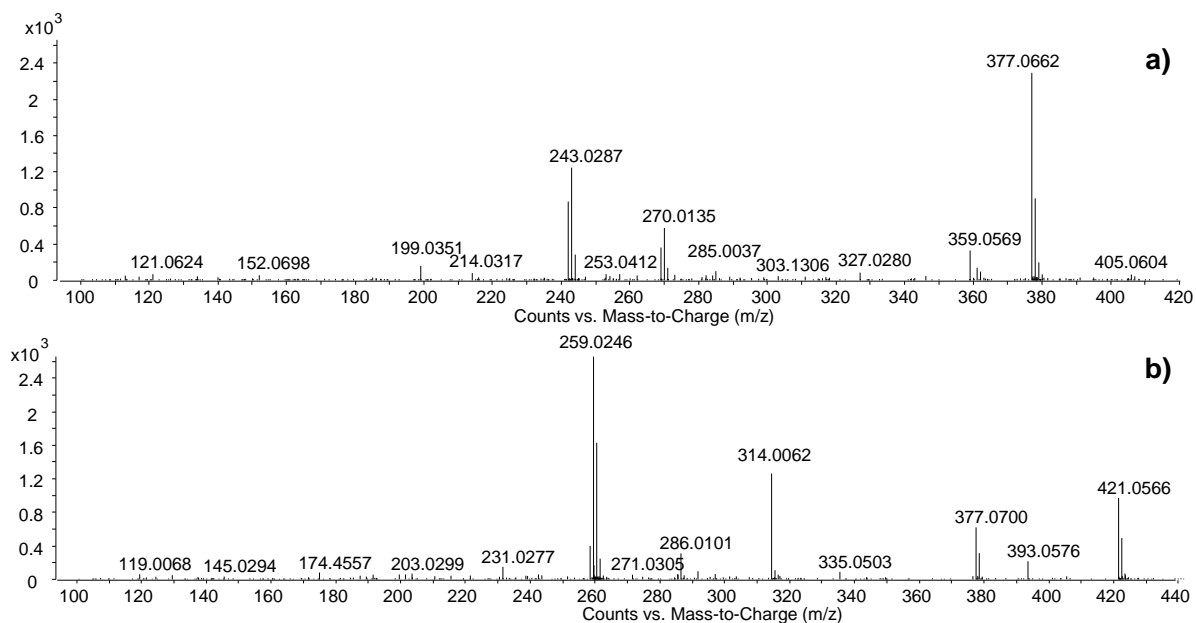

**Figure S9.** MS/MS spectra (negative ESI, collision energy 25V) of some compounds detected in samples 11D and 23D with calculated molecular masses of the deprotonated molecules **a)**  $m/z$  405.0616 and **b)**  $m/z$  421.0565.
